# Supplementary material for: Rare-earth metal bis(aminobenzyl) complexes supported by pyrrolyl-functionalized arylamide ligands: synthesis, characterization and styrene polymerization performance
Source: Royal Society of Chemistry journal article supplement (doi:10.1039/c8dt01834k), 2018-01-01
Supplement: c8dt01834k1.pdf [file c8dt01834k1.pdf]

## Supporting Information for

# Rare-earth metal bis(aminobenzyl) complexes supported by pyrrolyl-functionalized arylamide ligands: synthesis, characterization and styrene polymerization performance

Min Li,<sup>a</sup> Chaopan Wang,<sup>a</sup> Hongzhen Xie,<sup>a</sup> Zehuai Mou<sup>a</sup> and Yunjie Luo<sup>\*,a,b</sup>

<sup>a</sup> School of Material Science and Chemical Engineering, Ningbo University, Ningbo

315211, P. R. China

<sup>b</sup> State Key Laboratory of Polymer Physics and Chemistry, Changchun Institute of

Applied Chemistry, Chinese Academy of Sciences, Changchun 130022, P. R. China

Corresponding author: E-mail: [luoyunjie@nbu.edu.cn](mailto:luoyunjie@nbu.edu.cn)

## Table of Contents

- SFig. 1. <sup>1</sup>H NMR spectrum of 2,5-Me<sub>2</sub>C<sub>4</sub>H<sub>2</sub>NCH<sub>2</sub>SiMe<sub>2</sub>NHC<sub>6</sub>H<sub>5</sub> (**HL**<sup>1</sup>)
- SFig. 2. <sup>13</sup>C NMR spectrum of 2,5-Me<sub>2</sub>C<sub>4</sub>H<sub>2</sub>NCH<sub>2</sub>SiMe<sub>2</sub>NHC<sub>6</sub>H<sub>5</sub> (**HL**<sup>1</sup>)
- SFig. 3. <sup>1</sup>H NMR spectrum of 2,5-Me<sub>2</sub>C<sub>4</sub>H<sub>2</sub>NCH<sub>2</sub>SiMe<sub>2</sub>NHC<sub>6</sub>H<sub>4</sub>Cl-*p* (**HL**<sup>2</sup>)
- SFig. 4. <sup>13</sup>C NMR spectrum of 2,5-Me<sub>2</sub>C<sub>4</sub>H<sub>2</sub>NCH<sub>2</sub>SiMe<sub>2</sub>NHC<sub>6</sub>H<sub>4</sub>Cl-*p* (**HL**<sup>2</sup>)
- SFig. 5. <sup>1</sup>H NMR spectrum of (2,5-Me<sub>2</sub>C<sub>4</sub>H<sub>2</sub>NCH<sub>2</sub>SiMe<sub>2</sub>NC<sub>6</sub>H<sub>5</sub>)Sc(CH<sub>2</sub>C<sub>6</sub>H<sub>4</sub>NMe<sub>2</sub>-*o*)<sub>2</sub> (**1**)
- SFig. 6. <sup>13</sup>C NMR spectrum of (2,5-Me<sub>2</sub>C<sub>4</sub>H<sub>2</sub>NCH<sub>2</sub>SiMe<sub>2</sub>NC<sub>6</sub>H<sub>5</sub>)Sc(CH<sub>2</sub>C<sub>6</sub>H<sub>4</sub>NMe<sub>2</sub>-*o*)<sub>2</sub> (**1**)
- SFig. 7. <sup>1</sup>H NMR spectrum of (2,5-Me<sub>2</sub>C<sub>4</sub>H<sub>2</sub>NCH<sub>2</sub>SiMe<sub>2</sub>NC<sub>6</sub>H<sub>5</sub>)La(CH<sub>2</sub>C<sub>6</sub>H<sub>4</sub>NMe<sub>2</sub>-*o*)<sub>2</sub> (**2**)
- SFig. 8. <sup>13</sup>C NMR spectrum of (2,5-Me<sub>2</sub>C<sub>4</sub>H<sub>2</sub>NCH<sub>2</sub>SiMe<sub>2</sub>NC<sub>6</sub>H<sub>5</sub>)La(CH<sub>2</sub>C<sub>6</sub>H<sub>4</sub>NMe<sub>2</sub>-*o*)<sub>2</sub> (**2**)
- SFig. 9. <sup>1</sup>H NMR spectrum of (2,5-Me<sub>2</sub>C<sub>4</sub>H<sub>2</sub>NCH<sub>2</sub>SiMe<sub>2</sub>NC<sub>6</sub>H<sub>5</sub>)Lu(CH<sub>2</sub>C<sub>6</sub>H<sub>4</sub>NMe<sub>2</sub>-*o*)<sub>2</sub> (**3**)
- SFig. 10. <sup>13</sup>C NMR spectrum of (2,5-Me<sub>2</sub>C<sub>4</sub>H<sub>2</sub>NCH<sub>2</sub>SiMe<sub>2</sub>NC<sub>6</sub>H<sub>5</sub>)Lu(CH<sub>2</sub>C<sub>6</sub>H<sub>4</sub>NMe<sub>2</sub>-*o*)<sub>2</sub> (**3**)
- SFig. 11. <sup>1</sup>H NMR spectrum of (2,5-Me<sub>2</sub>C<sub>4</sub>H<sub>2</sub>NCH<sub>2</sub>SiMe<sub>2</sub>NC<sub>6</sub>H<sub>4</sub>Cl-*p*)Sc(CH<sub>2</sub>C<sub>6</sub>H<sub>4</sub>NMe<sub>2</sub>-*o*)<sub>2</sub> (**4**)
- SFig. 12. <sup>13</sup>C NMR spectrum of (2,5-Me<sub>2</sub>C<sub>4</sub>H<sub>2</sub>NCH<sub>2</sub>SiMe<sub>2</sub>NC<sub>6</sub>H<sub>4</sub>Cl-*p*)Sc(CH<sub>2</sub>C<sub>6</sub>H<sub>4</sub>NMe<sub>2</sub>-*o*)<sub>2</sub> (**4**)
- SFig. 13. <sup>1</sup>H NMR spectrum of (2,5-Me<sub>2</sub>C<sub>4</sub>H<sub>2</sub>NCH<sub>2</sub>SiMe<sub>2</sub>NC<sub>6</sub>H<sub>4</sub>Cl-*p*)La(CH<sub>2</sub>C<sub>6</sub>H<sub>4</sub>NMe<sub>2</sub>-*o*)<sub>2</sub> (**5**)
- SFig. 14. <sup>13</sup>C NMR spectrum of (2,5-Me<sub>2</sub>C<sub>4</sub>H<sub>2</sub>NCH<sub>2</sub>SiMe<sub>2</sub>NC<sub>6</sub>H<sub>4</sub>Cl-*p*)La(CH<sub>2</sub>C<sub>6</sub>H<sub>4</sub>NMe<sub>2</sub>-*o*)<sub>2</sub> (**5**)
- SFig. 15. <sup>1</sup>H NMR spectrum of (2,5-Me<sub>2</sub>C<sub>4</sub>H<sub>2</sub>NCH<sub>2</sub>SiMe<sub>2</sub>NC<sub>6</sub>H<sub>4</sub>Cl-*p*)Lu(CH<sub>2</sub>C<sub>6</sub>H<sub>4</sub>NMe<sub>2</sub>-*o*)<sub>2</sub> (**6**)
- SFig. 16. <sup>13</sup>C NMR spectrum of (2,5-Me<sub>2</sub>C<sub>4</sub>H<sub>2</sub>NCH<sub>2</sub>SiMe<sub>2</sub>NC<sub>6</sub>H<sub>4</sub>Cl-*p*)Lu(CH<sub>2</sub>C<sub>6</sub>H<sub>4</sub>NMe<sub>2</sub>-*o*)<sub>2</sub> (**6**)
- SFig. 17. GPC curve of representative polymer
- SFig. 18. <sup>13</sup>C NMR spectrum of representative polymer

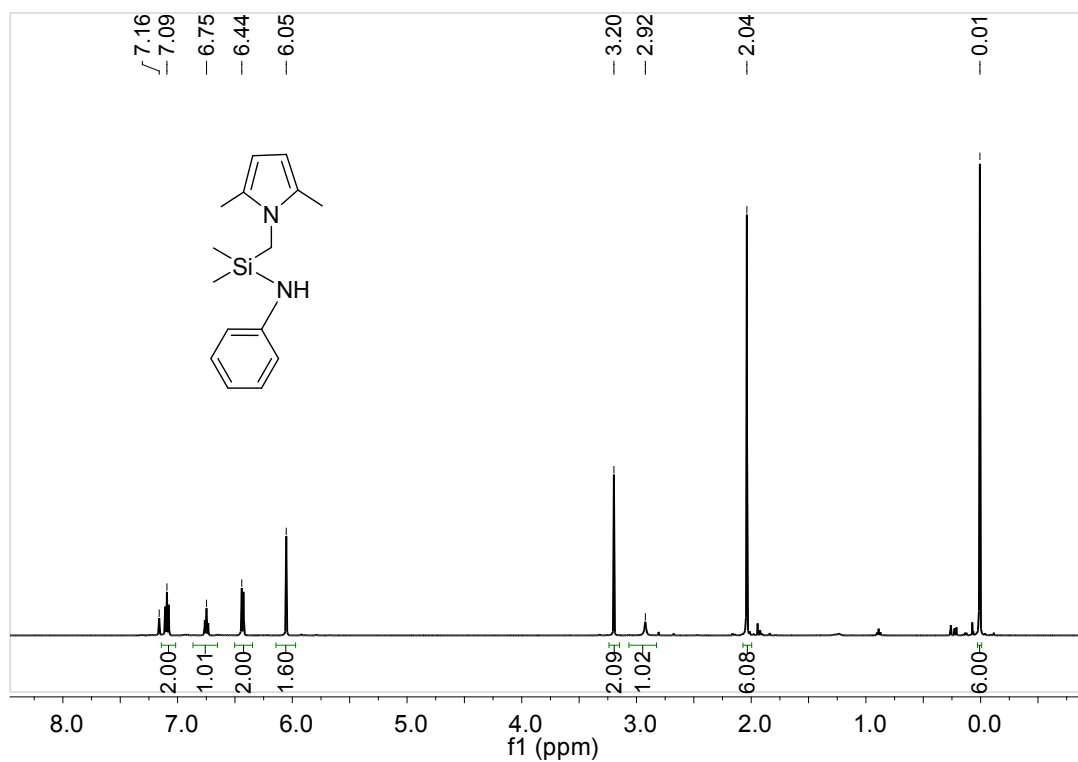

SFig. 1.  $^1\text{H}$  NMR (500 MHz,  $\text{C}_6\text{D}_6$ ) spectrum of 2,5- $\text{Me}_2\text{C}_4\text{H}_2\text{NCH}_2\text{SiMe}_2\text{NHC}_6\text{H}_5$  (**HL**<sup>1</sup>)

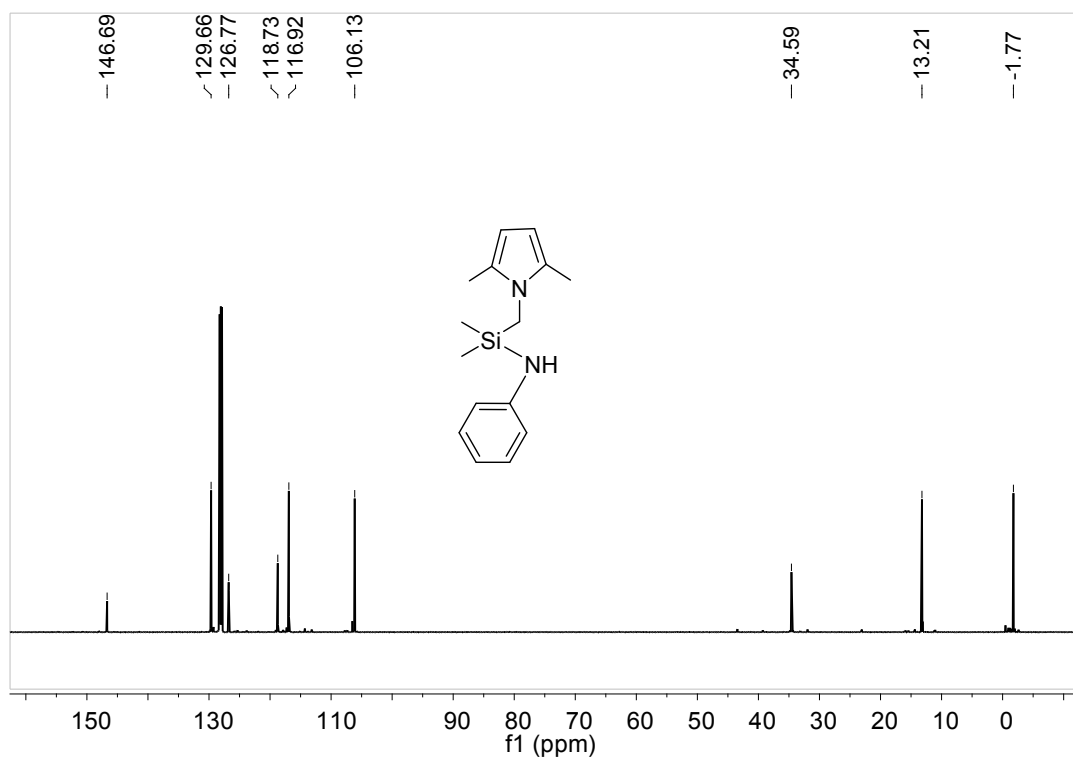

SFig. 2.  $^{13}\text{C}$  NMR (125 MHz,  $\text{C}_6\text{D}_6$ ) spectrum of 2,5- $\text{Me}_2\text{C}_4\text{H}_2\text{NCH}_2\text{SiMe}_2\text{NHC}_6\text{H}_5$  (**HL**<sup>1</sup>)

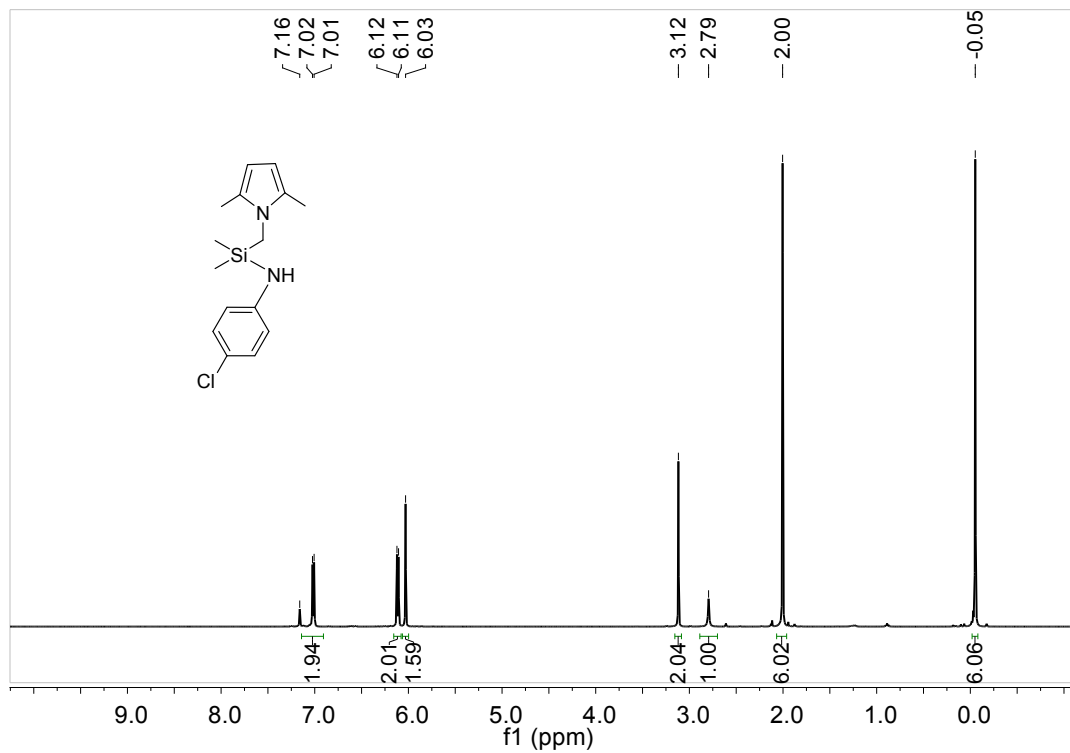

SFig. 3.  $^1\text{H}$  NMR (500 MHz,  $\text{C}_6\text{D}_6$ ) spectrum of 2,5- $\text{Me}_2\text{C}_4\text{H}_2\text{NCH}_2\text{SiMe}_2\text{NHC}_6\text{H}_4\text{Cl-}p$  (**HL<sup>2</sup>**)

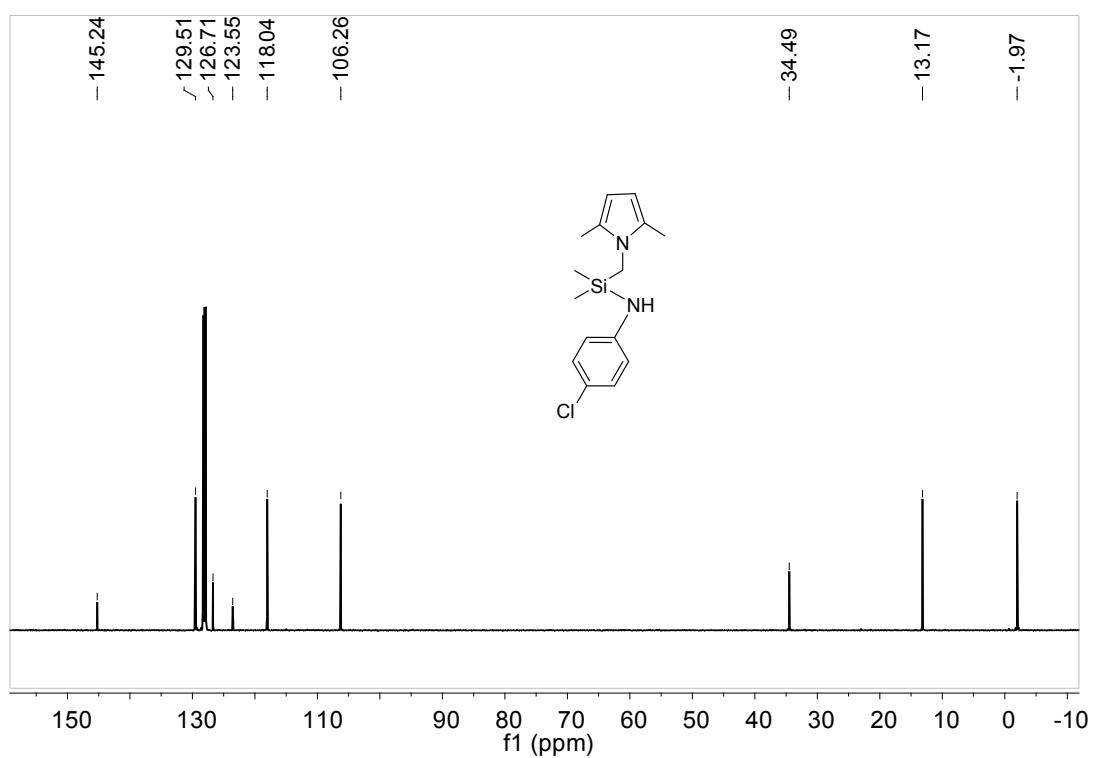

SFig. 4.  $^{13}\text{C}$  NMR (125 MHz,  $\text{C}_6\text{D}_6$ ) spectrum of 2,5- $\text{Me}_2\text{C}_4\text{H}_2\text{NCH}_2\text{SiMe}_2\text{NHC}_6\text{H}_4\text{Cl-}p$  (**HL<sup>2</sup>**)

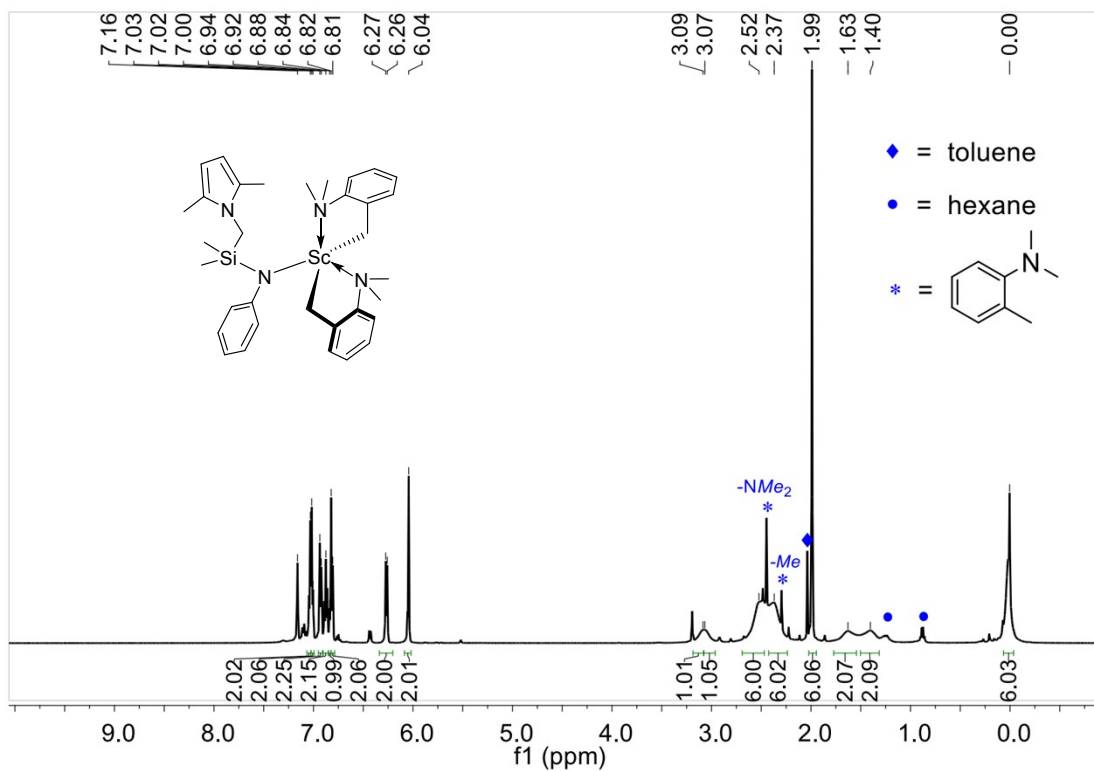

SFig. 5.  $^1\text{H}$  NMR spectrum of  $(2,5\text{-Me}_2\text{C}_4\text{H}_2\text{NCH}_2\text{SiMe}_2\text{NC}_6\text{H}_5)\text{Sc}(\text{CH}_2\text{C}_6\text{H}_4\text{NMe}_2\text{-}o)_2$  (**1**)

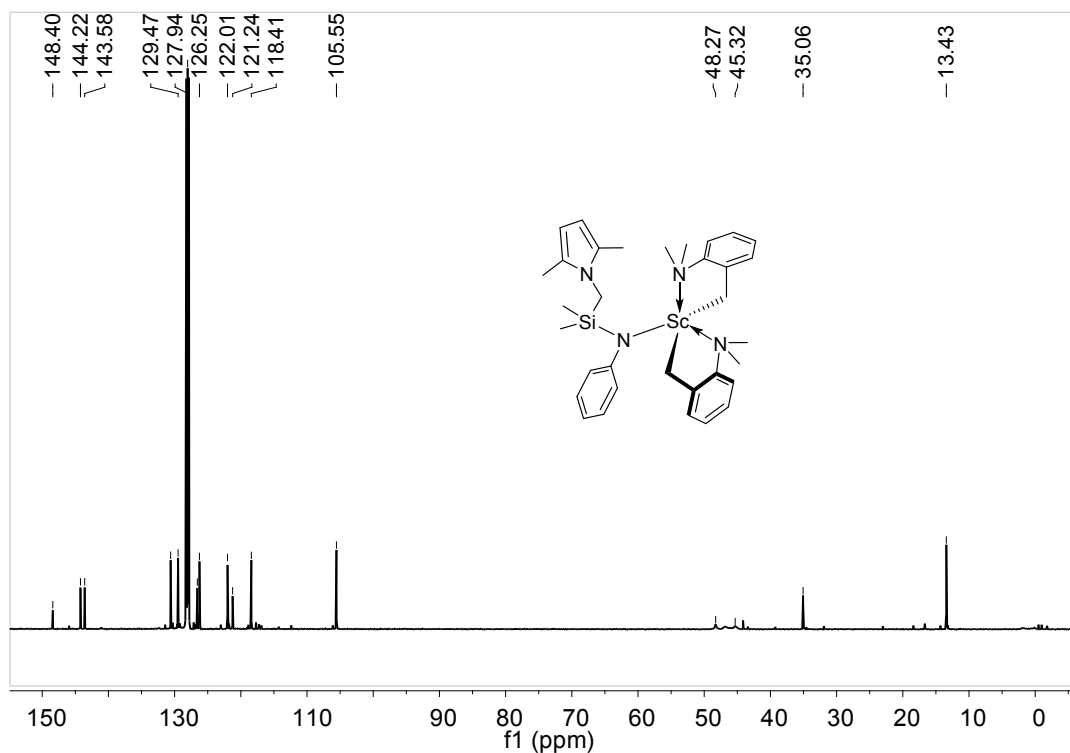

SFig. 6.  $^{13}\text{C}$  NMR spectrum of  $(2,5\text{-Me}_2\text{C}_4\text{H}_2\text{NCH}_2\text{SiMe}_2\text{NC}_6\text{H}_5)\text{Sc}(\text{CH}_2\text{C}_6\text{H}_4\text{NMe}_2\text{-}o)_2$  (**1**)

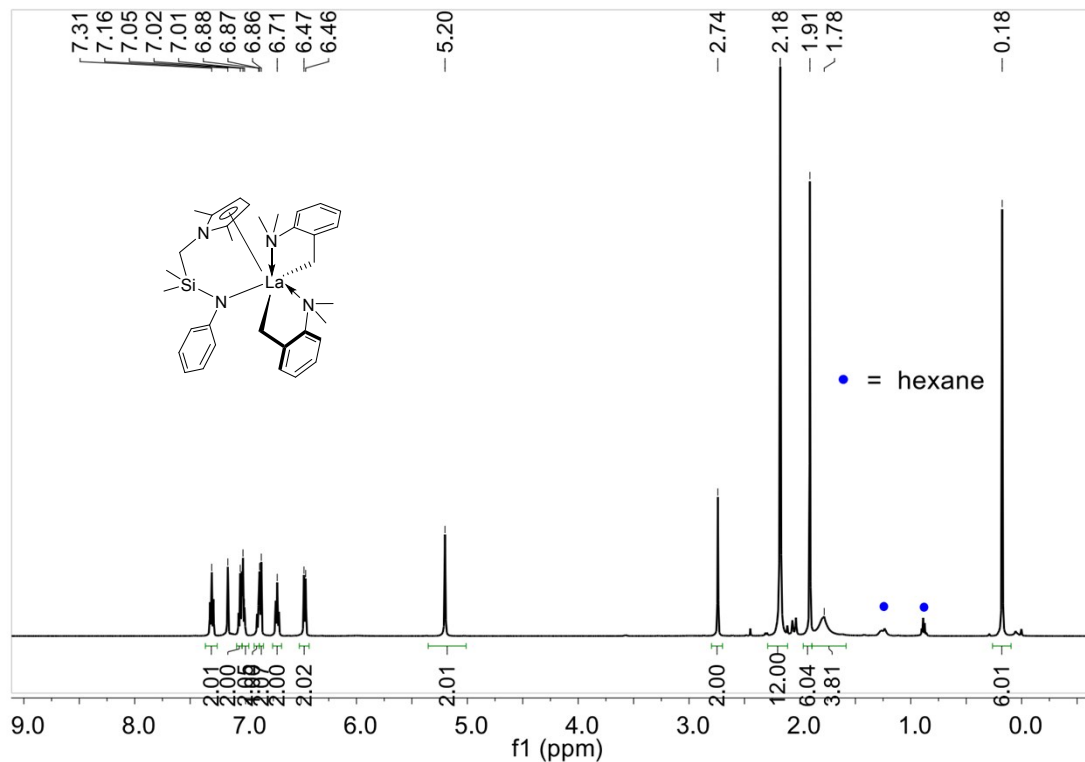

SFig. 7.  $^1\text{H}$  NMR spectrum of  $(2,5\text{-Me}_2\text{C}_4\text{H}_2\text{NCH}_2\text{SiMe}_2\text{NC}_6\text{H}_5)\text{La}(\text{CH}_2\text{C}_6\text{H}_4\text{NMe}_2\text{-}o)_2$  (2)

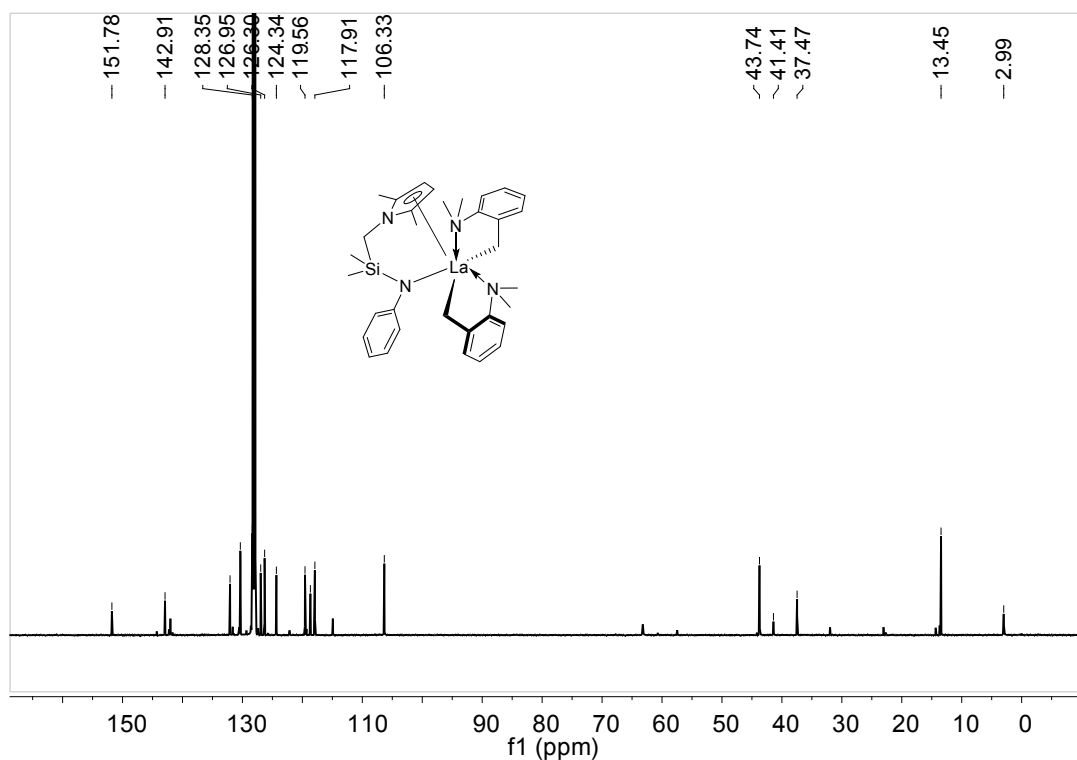

SFig. 8.  $^{13}\text{C}$  NMR spectrum of  $(2,5\text{-Me}_2\text{C}_4\text{H}_2\text{NCH}_2\text{SiMe}_2\text{NC}_6\text{H}_5)\text{La}(\text{CH}_2\text{C}_6\text{H}_4\text{NMe}_2\text{-}o)_2$  (2)

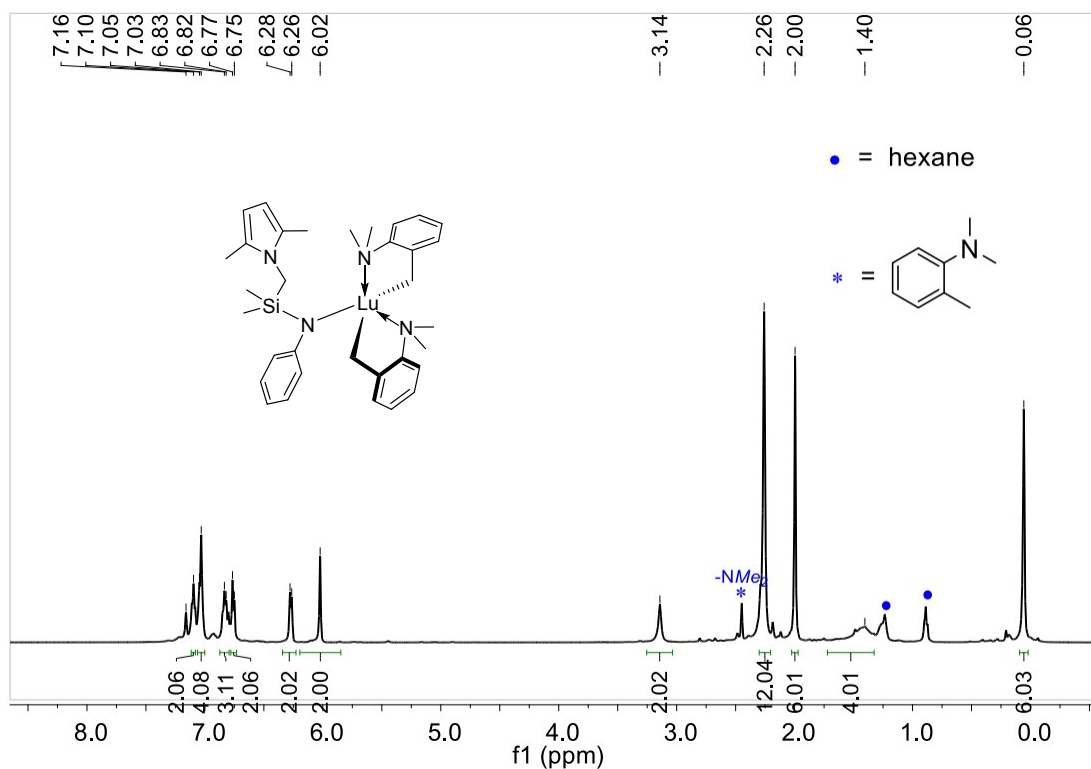

SFig. 9.  $^1\text{H}$  NMR spectrum of  $(2,5\text{-Me}_2\text{C}_4\text{H}_2\text{NCH}_2\text{SiMe}_2\text{NC}_6\text{H}_5)\text{Lu}(\text{CH}_2\text{C}_6\text{H}_4\text{NMe}_2\text{-}o)_2$  (**3**)

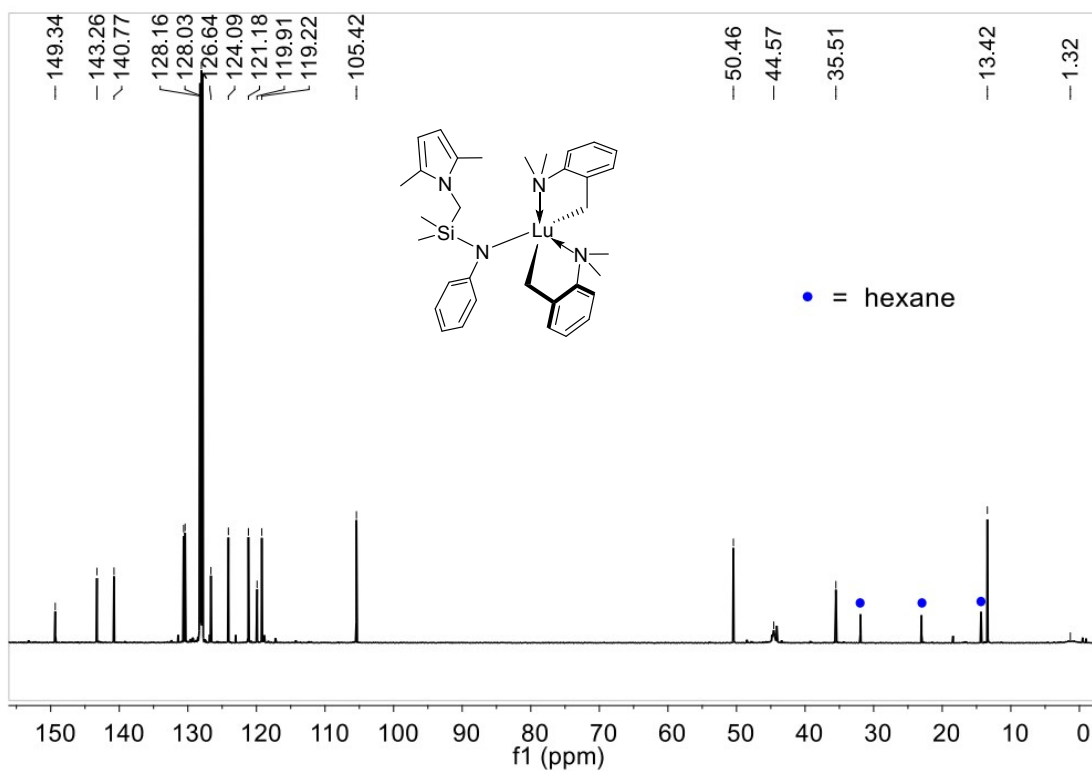

SFig. 10.  $^{13}\text{C}$  NMR spectrum of  $(2,5\text{-Me}_2\text{C}_4\text{H}_2\text{NCH}_2\text{SiMe}_2\text{NC}_6\text{H}_5)\text{Lu}(\text{CH}_2\text{C}_6\text{H}_4\text{NMe}_2\text{-}o)_2$  (**3**)

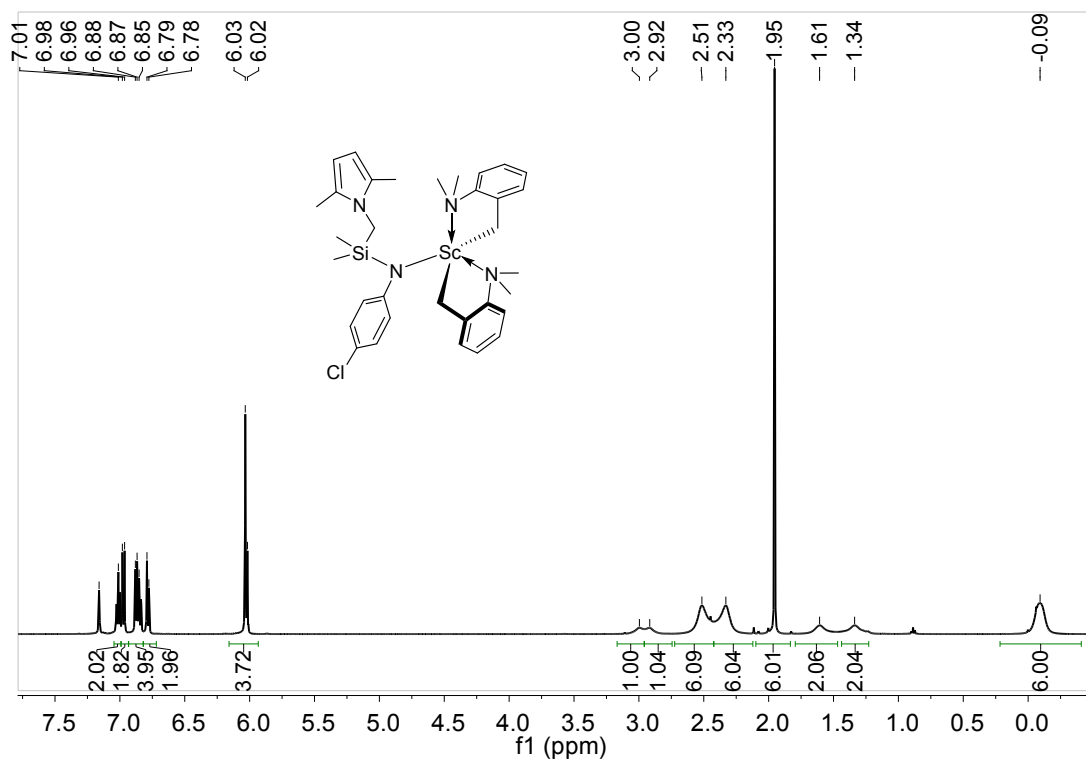

SFig. 11.  $^1\text{H}$  NMR spectrum of  $(2,5\text{-Me}_2\text{C}_4\text{H}_2\text{NCH}_2\text{SiMe}_2\text{NC}_6\text{H}_4\text{Cl-}p)\text{Sc}(\text{CH}_2\text{C}_6\text{H}_4\text{NMe}_2\text{-}o)_2$  (4)

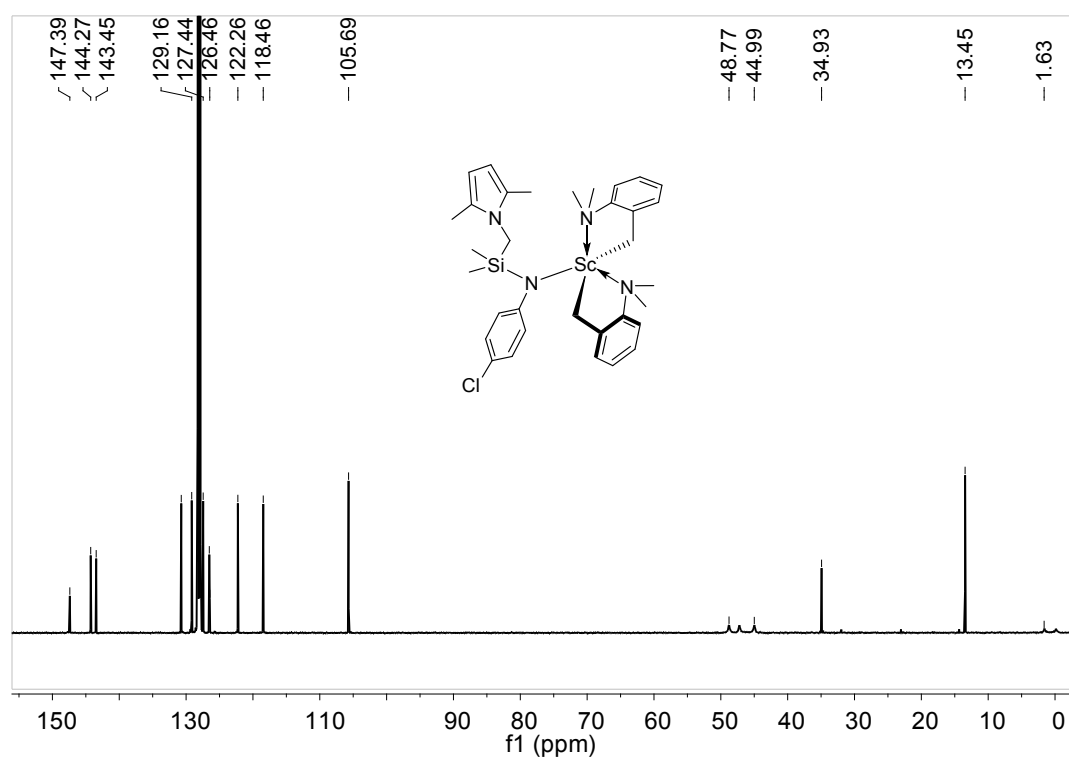

SFig. 12.  $^{13}\text{C}$  NMR spectrum of  $(2,5\text{-Me}_2\text{C}_4\text{H}_2\text{NCH}_2\text{SiMe}_2\text{NC}_6\text{H}_4\text{Cl-}p)\text{Sc}(\text{CH}_2\text{C}_6\text{H}_4\text{NMe}_2\text{-}o)_2$  (4)

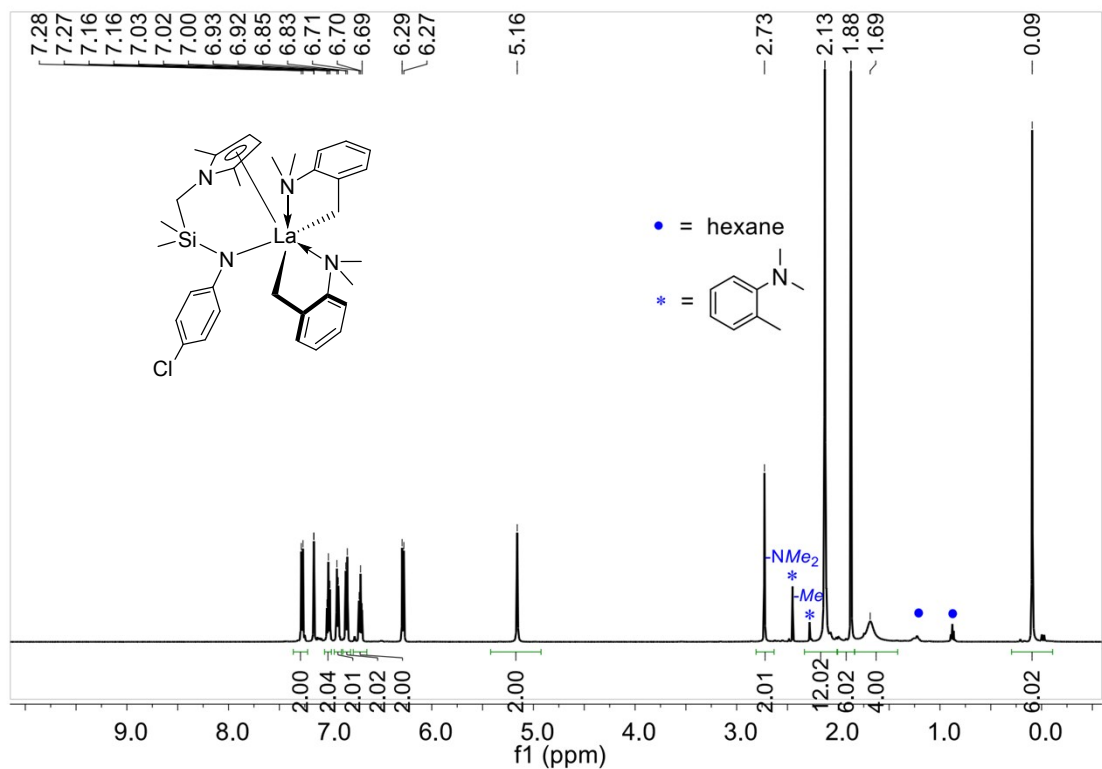

SFig. 13.  $^1\text{H}$  NMR spectrum of (2,5-Me<sub>2</sub>C<sub>4</sub>H<sub>2</sub>NCH<sub>2</sub>SiMe<sub>2</sub>NC<sub>6</sub>H<sub>4</sub>Cl-*p*)La(CH<sub>2</sub>C<sub>6</sub>H<sub>4</sub>NMe<sub>2</sub>-*o*)<sub>2</sub> (5)

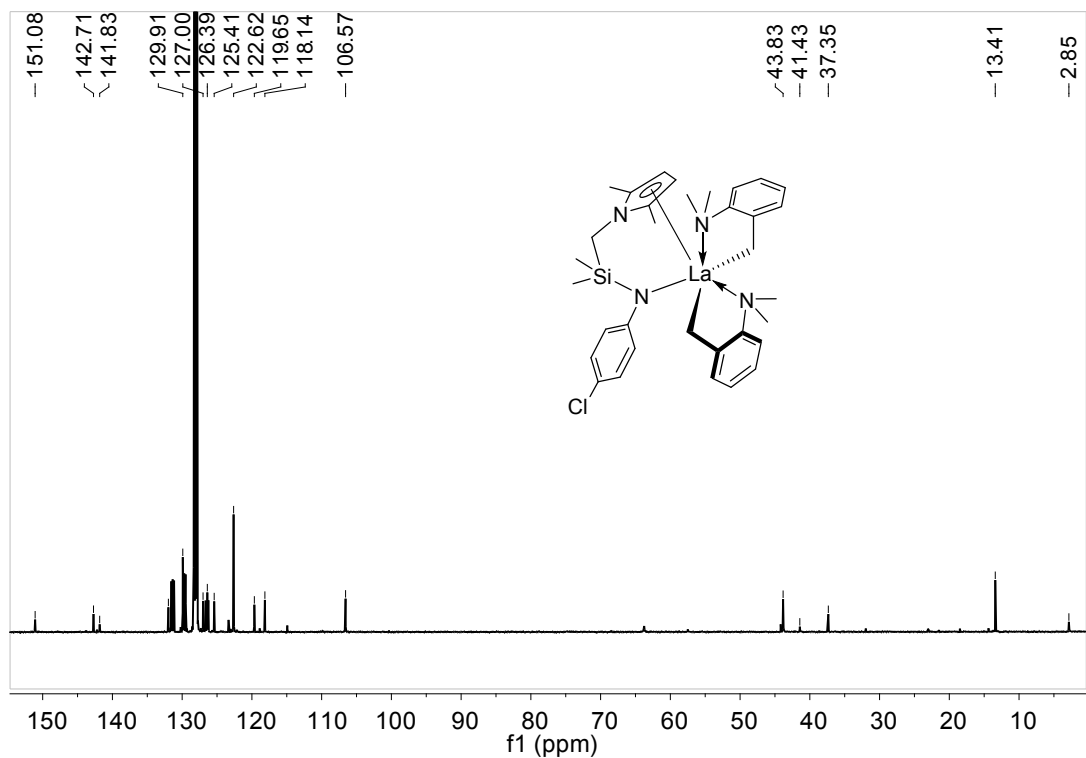

SFig. 14.  $^{13}\text{C}$  NMR spectrum of (2,5-Me<sub>2</sub>C<sub>4</sub>H<sub>2</sub>NCH<sub>2</sub>SiMe<sub>2</sub>NC<sub>6</sub>H<sub>4</sub>Cl-*p*)La(CH<sub>2</sub>C<sub>6</sub>H<sub>4</sub>NMe<sub>2</sub>-*o*)<sub>2</sub> (5)



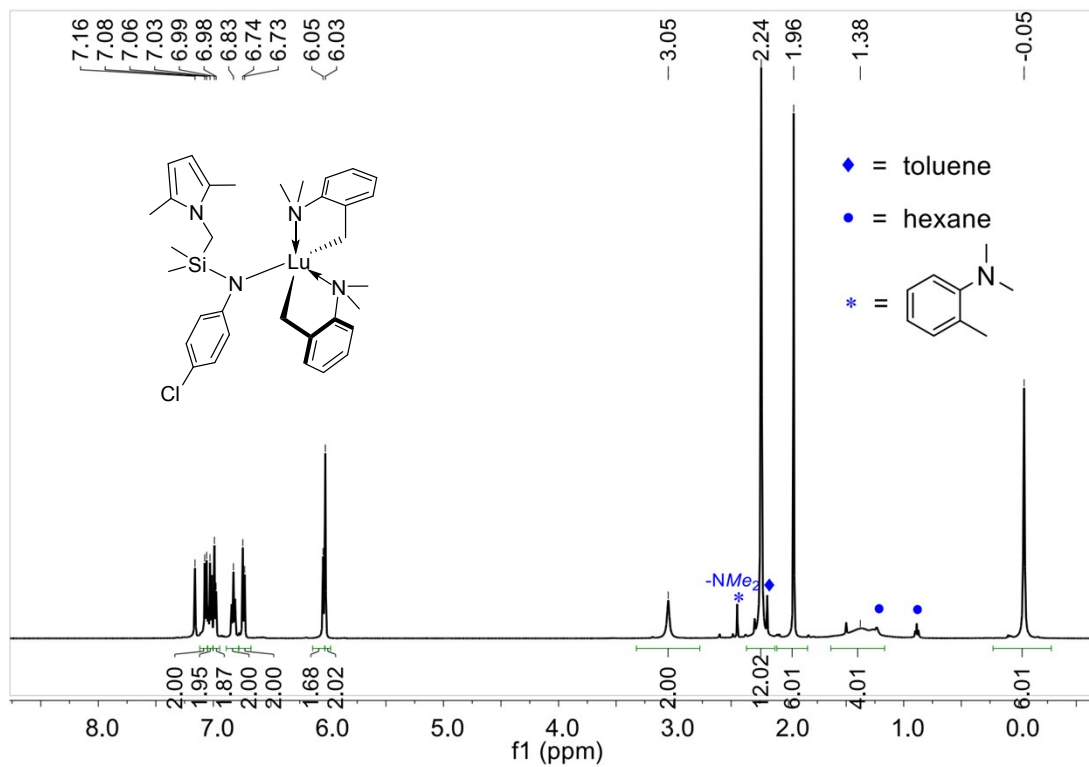

SFig. 15.  $^1\text{H}$  NMR spectrum of  $(2,5\text{-Me}_2\text{C}_4\text{H}_2\text{NCH}_2\text{SiMe}_2\text{NC}_6\text{H}_4\text{Cl-}p)\text{Lu}(\text{CH}_2\text{C}_6\text{H}_4\text{NMe}_2\text{-}o)_2$  (**6**)

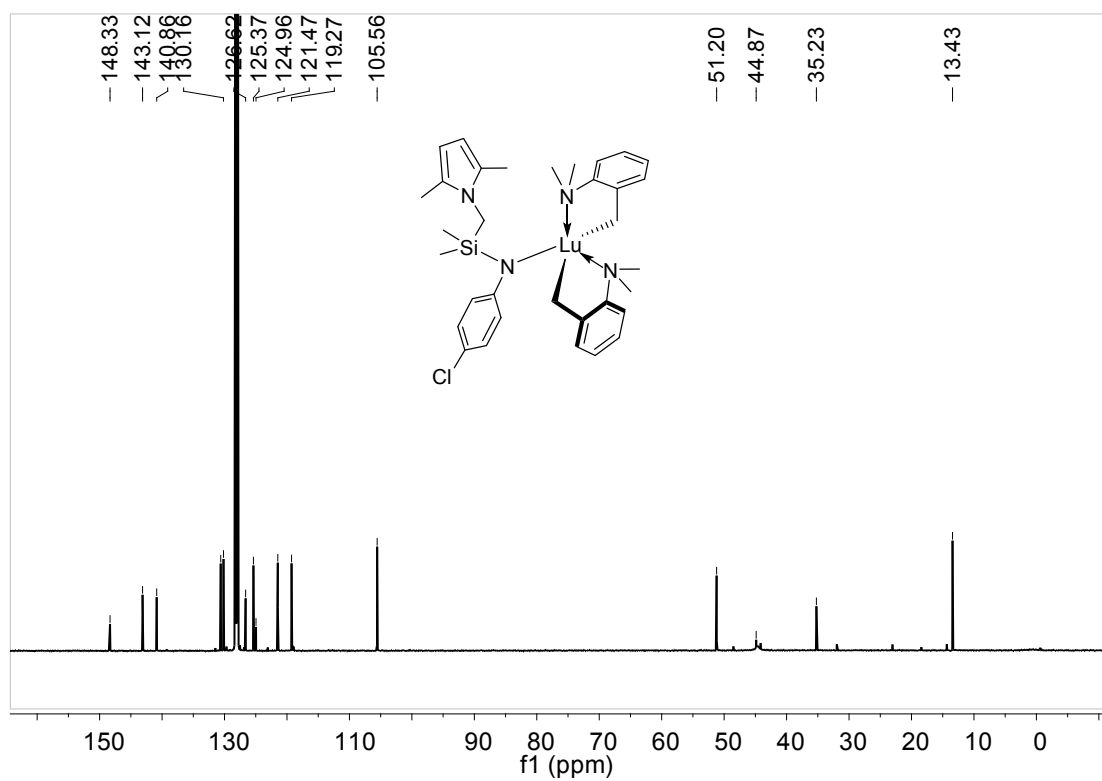

SFig. 16.  $^{13}\text{C}$  NMR spectrum of  $(2,5\text{-Me}_2\text{C}_4\text{H}_2\text{NCH}_2\text{SiMe}_2\text{NC}_6\text{H}_4\text{Cl-}p)\text{Lu}(\text{CH}_2\text{C}_6\text{H}_4\text{NMe}_2\text{-}o)_2$  (**6**)

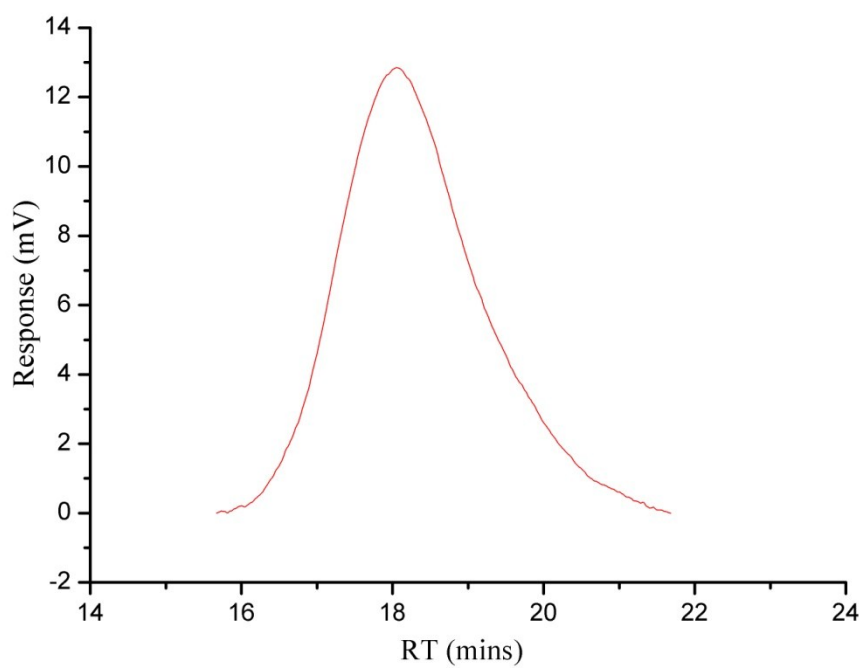

SFig. 17 GPC curve for representative polymer

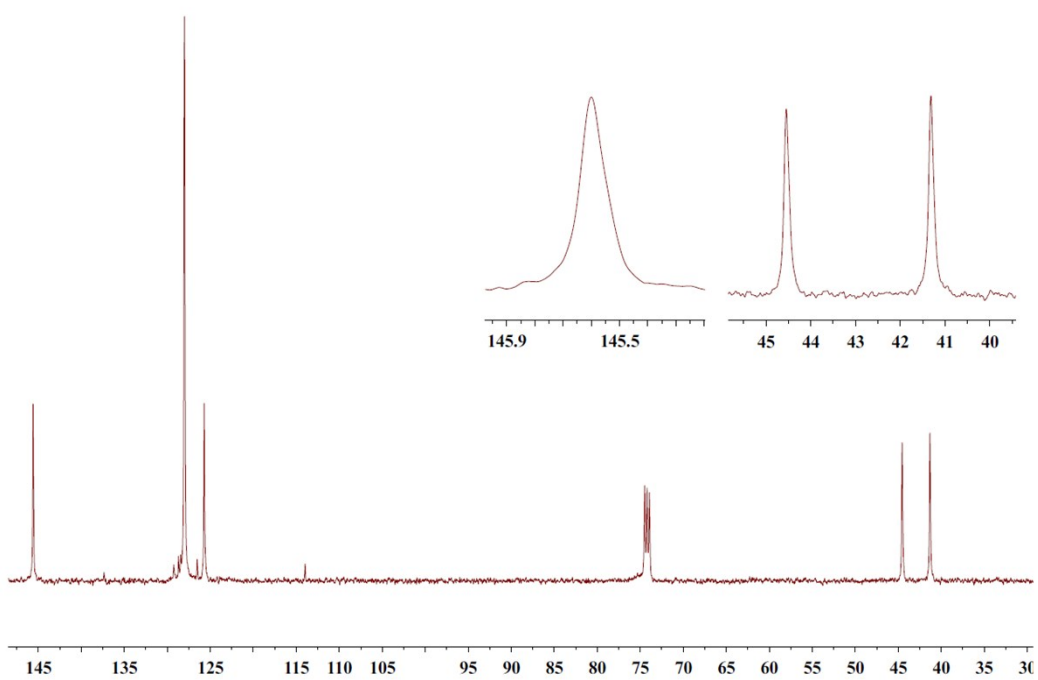

SFig. 18 <sup>13</sup>C NMR for representative polymer
